# Supplementary material for: Ultrafast ionization and subsequent coulomb explosion of zirconium oxide and tungsten carbide “superatomic” cluster species and comparison to group 10 metals
Source: Royal Society of Chemistry journal article supplement (doi:10.1039/c2nj40496f), 2012-01-01
Supplement: c2nj40496f.pdf [file c2nj40496f.pdf]

## Ultrafast Ionization and Subsequent Coulomb Explosion of Zirconium Oxide and Tungsten Carbide “Superatomic” Cluster Species and Comparison to Group 10 Metals

Matt W. Ross and A.W. Castleman Jr.<sup>†</sup>

Departments of Chemistry and Physics, The Pennsylvania State University,  
University Park, PA 16802

<sup>†</sup>Corresponding Author: email: [awc@psu.edu](mailto:awc@psu.edu); Tel: (814) 865-7242; Fax: (814) 865-5235

### Supporting Information

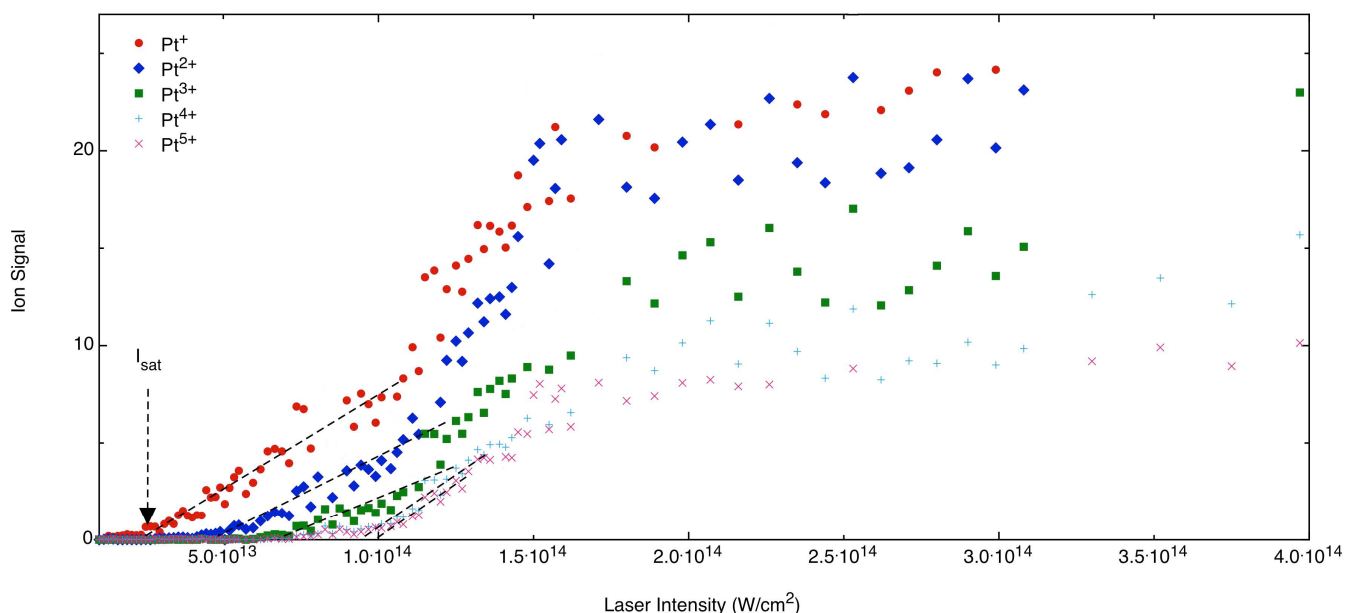

**Figure S1:** Extraction of saturation intensities ( $I_{\text{sat}}$ ) using a best fit line on a linear plot of ion signal. When the probability of ionization becomes unity for an ion state, ion signal changes from exponential to linear behavior and a straight line (dotted) drawn back to the x-axis is used to extract the saturation intensity within a range of  $\pm 3 \times 10^{12}$   $\text{W}/\text{cm}^2$ .

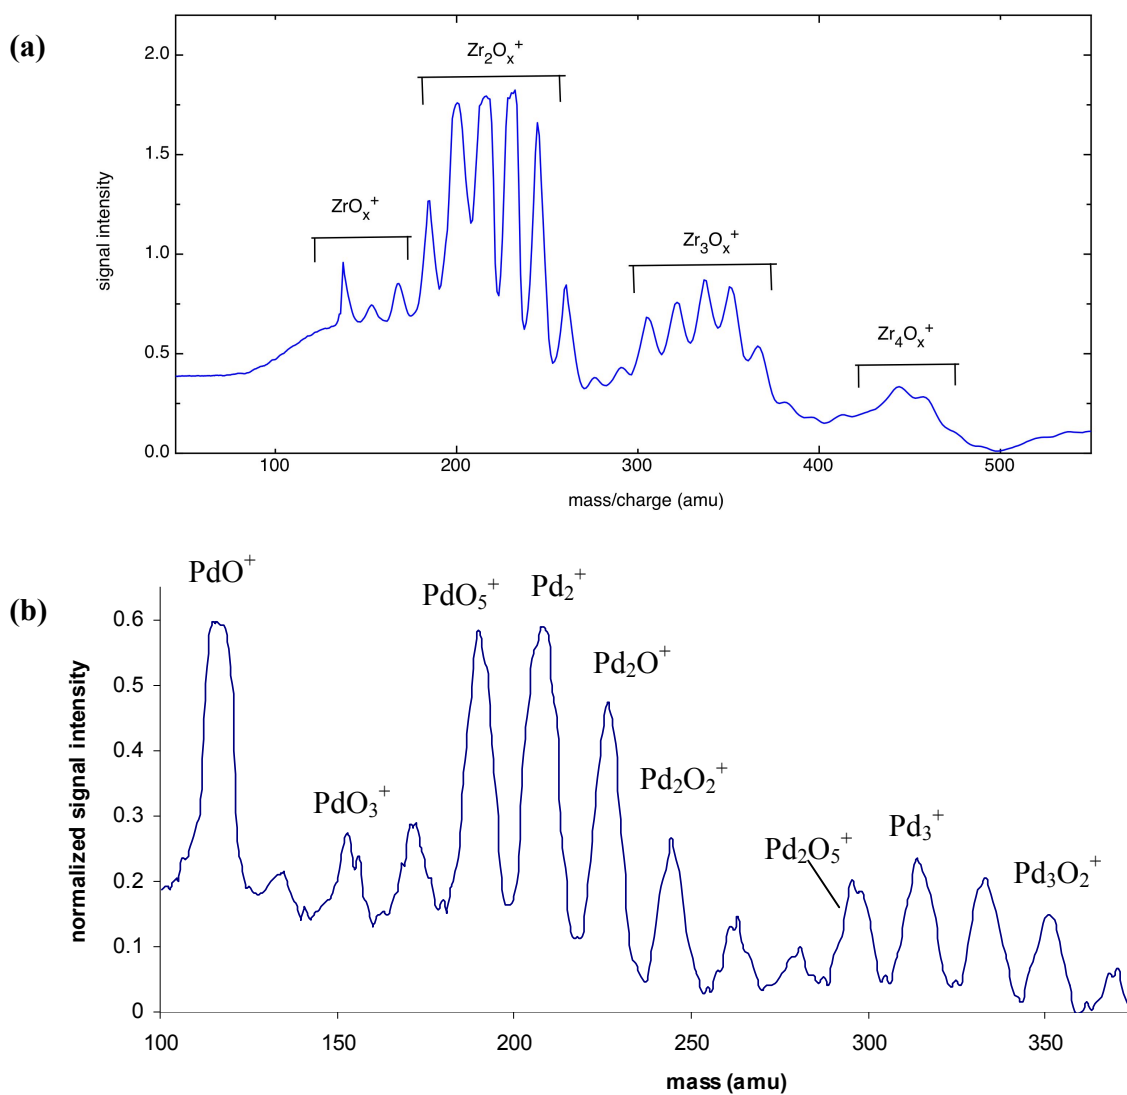

**Figure S2:** Cationic distribution of (a) small zirconium oxide clusters (b) small palladium oxide clusters detected by pulsing the TOF ion optics.

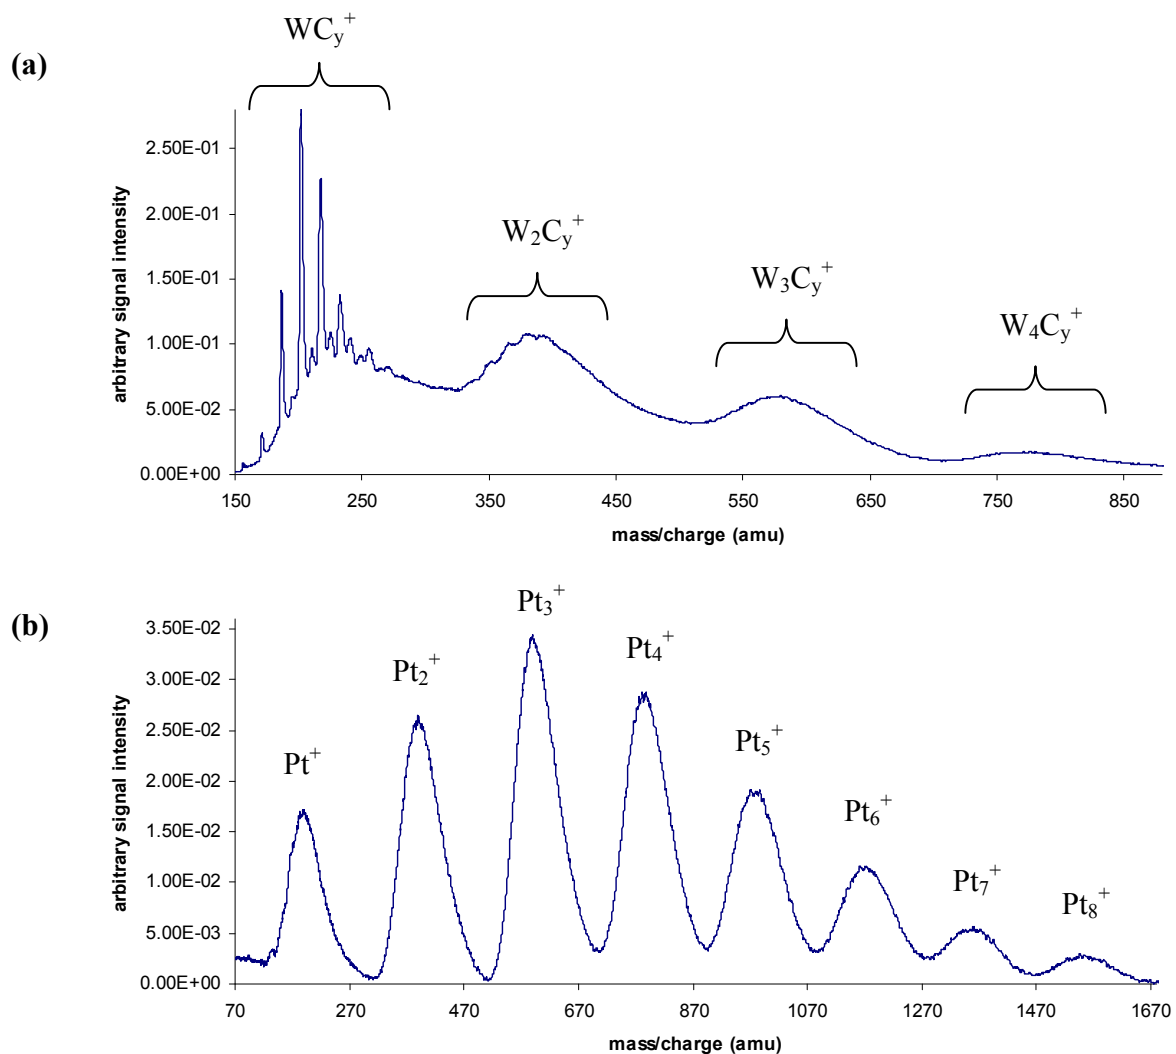

**Figure S3:** Cationic distribution of (a) small tungsten carbide clusters (b) small pure platinum clusters detected by pulsing the TOF ion optics.

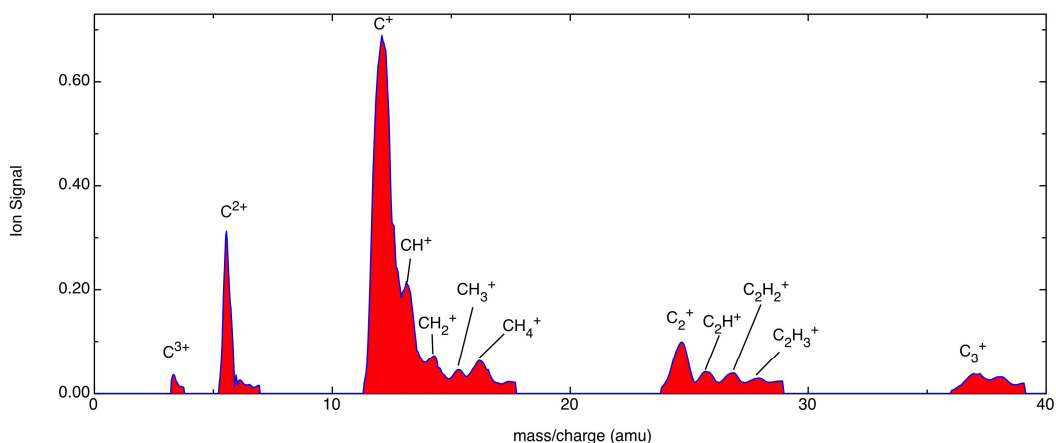

**Figure S4:** Carbon clusters formed from pulsing methane gas over tungsten metal.

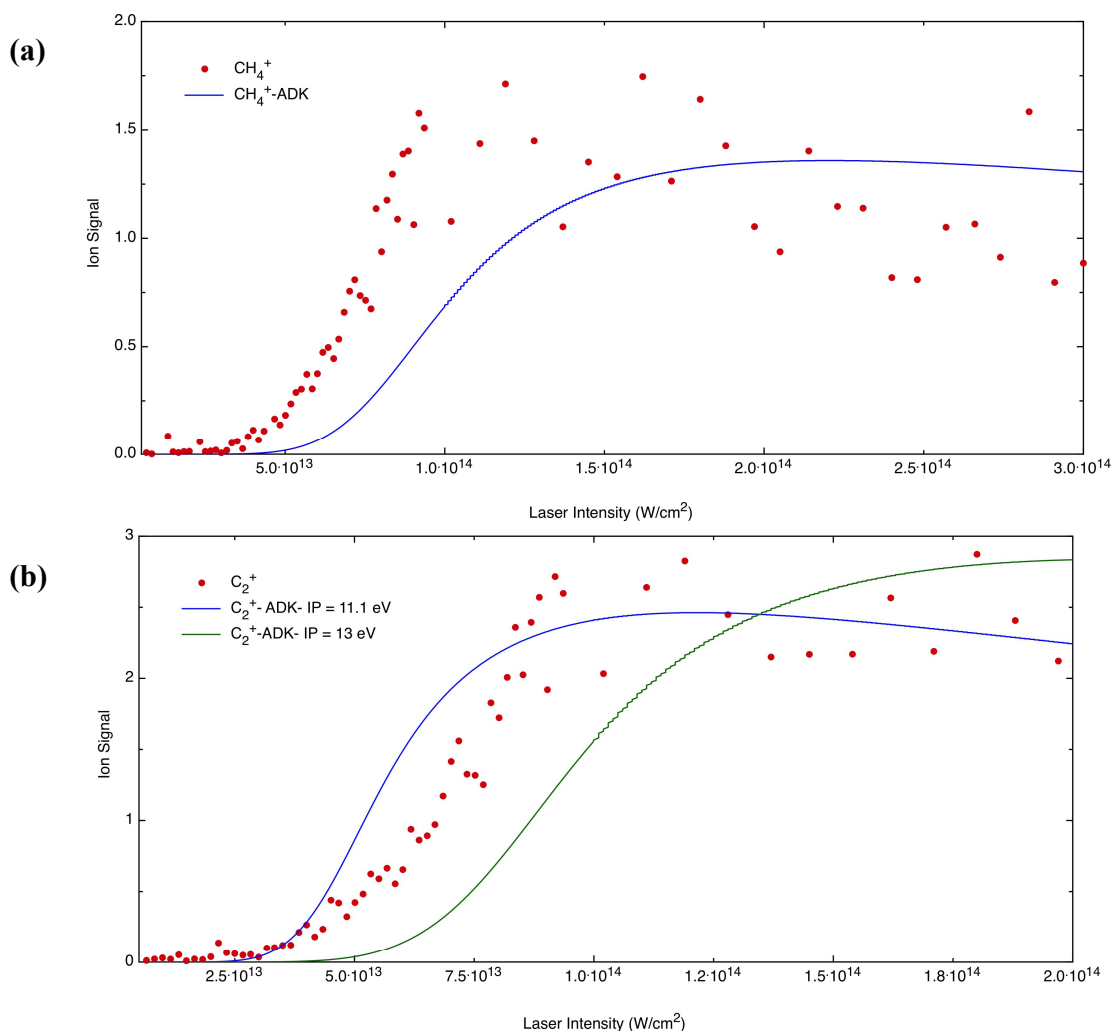

**Figure S5:** (a) methane ISS curve (dots) vs. sequential ionization potential predicted from ADK theory (solid line). (b) C<sub>2</sub><sup>+</sup> ISS curve (dots) with an ADK-fit ionization potential of 11.1 eV.
